# Supplementary material for: Differential Expression Analysis of Chemoreception Genes in the Striped Flea Beetle Phyllotreta striolata Using a Transcriptomic Approach
Source: PLoS One. 2016 Apr 11;11(4):e0153067. doi: 10.1371/journal.pone.0153067 (PMC4827873; doi:10.1371/journal.pone.0153067)
Supplement: S2 Table — (XLSX) [file pone.0153067.s007.xlsx]

## Sheet: S2 Table
S2 Table. Summary for the antennal and abdominal transcriptome of P. striolata.
Sample	Raw Reads	Clean reads	Clean bases	Error(%)	Q20(%)	Q30(%)	GC(%)
Female antennae _1	27392762	26563897	3.32G	0.03	96.38	92.73	45.02
Female antennae_2	27392762	26563897	3.32G	0.04	94.64	89.9	45.04
Female terminal abdomen_1	29666773	29291853	3.66G	0.03	96.53	92.94	45.84
Female terminal abdomen_2	29666773	29291853	3.66G	0.04	94.74	90.04	45.85
Male antennae _1	26944874	26294377	3.29G	0.03	96.41	92.78	44.6
Male antennae_2	26944874	26294377	3.29G	0.04	94.39	89.51	44.62
Male terminal abdomen_1	25559131	25183672	3.15G	0.03	96.41	92.77	45.12
Male terminal abdomen_2	25559131	25183672	3.15G	0.04	94.73	90.05	45.14
Raw reads: Raw sequence data, a unit for four behaviors, statistics for sequencing number of each file.
Clean reads: Calculation method is the same with raw reads, only the statistics file is filtered sequencing data.
Clean bases: The number of sequencing multiplied the length of sequencing, and converted into units of gigabytes (G).
Error rate: Base error rate.
Q20、Q30: Phred values are greater than 20 or 30 bases respectively accounted for the percentage of the overall bases.
GC content: The total number of G and C bases accounted for percentage of the total number of bases.
